# Supplementary material for: ATG5 Promotes Death Signaling in Response to the Cyclic Depsipeptides Coibamide A and Apratoxin A
Source: PubMed Central journal article supplement (PMC5867621; doi:10.3390/md16030077), 2018-03-01
Supplement: marinedrugs-16-00077-s001.pdf [file marinedrugs-16-00077-s001.pdf]

# Supplementary Material

## ATG5 Promotes Death Signaling in Response to the Cyclic Depsipeptides Coibamide A and Apratoxin A

Xuemei Wan<sup>1</sup>, Jeffrey D. Serrill<sup>1</sup>, Ian R. Humphreys<sup>1</sup>, Michelle Tan<sup>1</sup>, Kerry L. McPhail<sup>1</sup>, Ian G. Ganley<sup>2</sup> and Jane E. Ishmael<sup>1\*</sup>

<sup>1</sup> Department of Pharmaceutical Sciences, College of Pharmacy, Oregon State University, Corvallis, Oregon 97331, USA

<sup>2</sup> MRC Protein Phosphorylation and Ubiquitylation Unit, School of Life Sciences, University of Dundee, Dundee, Scotland, UK

\* Correspondence: jane.ishmael@oregonstate.edu; Tel.: +01-541-737-5783

### Calculation of Cell Doubling Time in Cultured MEFs

MEFs were seeded in a 6-well plate (Corning) with 24,000 cells/well. Cell doubling time was calculated when cells were in the log phase of growth:  $DT = T \ln 2 / \ln(X_e/X_b)$

Where:

$T$  = incubation time in any units

$X_b$  = cell number at the start of incubation time

$X_e$  = cell number at the end of incubation time

### Results

#### MEFs ATG +/+

Mean  $\pm$  SEM 24.1  $\pm$  1.8;  $N=4$

#### MEFs ATG -/-

Mean  $\pm$  SEM 19.7  $\pm$  2.4;  $N=4$

#### Figure S1: page 2

Comparison of cellular proliferation and doubling time in untreated wild-type, ATG5-null MEFs.

#### Figure S2: page 3

Analysis of ATG5 expression in wild-type, ATG5-null and ATG5-null mouse embryonic fibroblasts re-expressing GFP-ATG5.

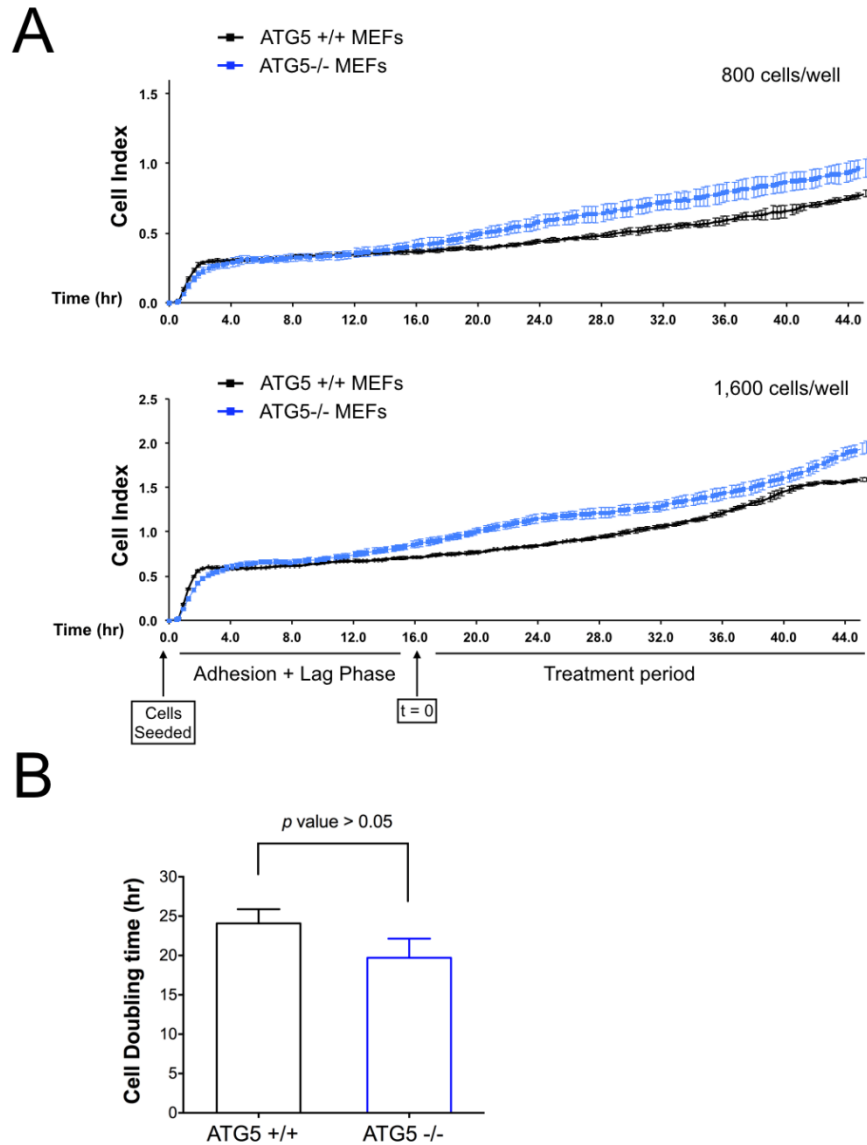

**Figure S1. Comparison of cellular proliferation and doubling time in untreated wild-type, ATG5-null MEFs.** (A) Continuous assessment of cellular proliferation using an xCELLigence real-time cellular analysis (RTCA) DP instrument (ACEA Biosciences, San Diego, CA). Wildtype and ATG5<sup>-/-</sup>-MEFs were seeded in E-plate with density of 800 or 1600 cells/well in triplicate in complete medium. Cells were allowed to equilibrate at room temperature for 30 min after seeded. E-plates were inserted into the xCELLigence instrument and impedance measurements were taken at 5 min interval for 8 h, and then at 15 min intervals for the remainder of the study. (B) Doubling time (h) of cells used in the study

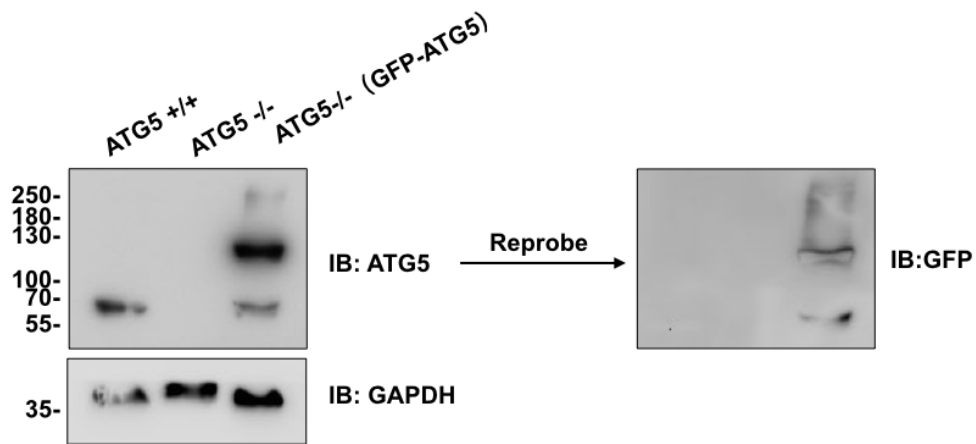

**Figure S2. Analysis of ATG5 expression in wild-type, ATG5-null and ATG5-null mouse embryonic fibroblasts re-expressing GFP-ATG5.** Immunoblot analysis of ATG5 expression (detected in the context of the covalent ATG5-ATG12 complex) in wild-type and ATG5<sup>-/-</sup> cells expressing GFP-ATG5. Whole cell lysates were probed with primary antibodies as indicated: anti-ATG5, anti-GFP, and anti-GAPDH.
